# Supplementary material
Source: PubMed Central journal article supplement (PMC5394872)
Supplement: 4bed9a6fefd496d45a02d8972951671b_2016_146894-Disclosures_and_Contributions.pdf [file 4bed9a6fefd496d45a02d8972951671b_2016_146894-Disclosures_and_Contributions.pdf]

Haematologica  
HAEMATOL/2016/146894  
Version 3

Erlotinib synergizes with the poly(ADP-ribose) glycohydrolase inhibitor  
ethacridine in acute myeloid leukemia cells

Lianne E. Rotin, Neil MacLean, Ahmed Aman, Marcela Gronda,  
Feng-Hsu Lin, Rose Hurren, XiaoMing Wang, Jeffrey L. Wrana,  
Alessandro Datti, Rima Al-awar, Mark D. Minden, and Aaron D.  
Schimmer

Disclosures: Dr. Schimmer reports personal fees from Ministry of Health, Province of Ontario, grants from CIHR, grants from Canadian Stem Cell Network, grants from Leukemia and Lymphoma Society of Canada, during the conduct of the study; grants from Aeglea Pharmaceuticals, grants and personal fees from Trillium Therapeutics, grants and non-financial support from Fluorinov Pharma, grants from MEI Pharma, grants and personal fees from Stem Cell Therapeutics, outside the submitted work. Lianne Rotin reports grants from CIHR and the University of Toronto during the conduct of the study. Dr. Wrana reports funding from Genome Canada.

Contributions: LER, NM, AA, MG, RH, XW, and AD performed research. LER, NM, AA, FL, AD, and MDM performed data analysis. MDM provided critical reagents. LER wrote the manuscript. ADS, JLW, and RA supervised the study.
