# Supplementary material
Source: PubMed Central journal article supplement (PMC5394872)
Supplement: 2016.146894.ROTIN_SUPPL.pdf [file 2016.146894.ROTIN_SUPPL.pdf]

**Erlotinib synergizes with the poly(ADP-ribose) glycohydrolase inhibitor ethacridine in acute myeloid leukemia cells**

---

*Lianne E. Rotin,<sup>1,2</sup> Neil MacLean,<sup>1</sup> Ahmed Aman,<sup>3</sup> Marcela Gronda,<sup>1</sup> Feng-Hsu Lin,<sup>1</sup> Rose Hurren,<sup>1</sup> XiaoMing Wang,<sup>1</sup> Jeffrey L Wrana,<sup>4</sup> Alessandro Datti,<sup>4,5</sup> Rima Al-awar,<sup>3,6</sup> Mark D. Minden,<sup>1,2</sup> and Aaron D. Schimmer<sup>1,2</sup>*

<sup>1</sup>Princess Margaret Cancer Centre, Ontario Cancer Institute, University Health Network, Toronto, ON, Canada; <sup>2</sup>Institute of Medical Science, University of Toronto, ON, Canada; <sup>3</sup>Drug Discovery Program, Ontario Institute for Cancer Research, Toronto, ON, Canada; <sup>4</sup>Samuel Lunenfeld Research Institute, Toronto, ON, Canada; <sup>5</sup>Department of Agricultural, Food, and Environmental Sciences, University of Perugia, Italy; <sup>6</sup>Department of Pharmacology and Toxicology, University of Toronto, ON, Canada

Correspondence: [aaron.schimmer@utoronto.ca](mailto:aaron.schimmer@utoronto.ca)  
doi:10.3324/haematol.2016.146894

Table S1

| Patient Demographics |           |                  |        |                                                                                                                                                                                                     |                             |
|----------------------|-----------|------------------|--------|-----------------------------------------------------------------------------------------------------------------------------------------------------------------------------------------------------|-----------------------------|
| Sample ID            | Diagnosis | Age at Diagnosis | Gender | Cytogenetics                                                                                                                                                                                        | Molecular                   |
| 130177               | AML, M4Eo | 62               | Male   | 46,XY,inv(16)(p13.1q22)[8]/46,XY[2]                                                                                                                                                                 | CBFB-MYH11 +,KIT-           |
| 130183               | AML       | 69               | Male   | 46,XY[20]                                                                                                                                                                                           | NPM1+, FLT3-ITD+, FLT3-TKD- |
| 130185               | AML       | 69               | Male   | 45,XY,der(1)t(1;?21)(p13;q11.2),del(5)(q13q33),-7,+8,-10,add(12)(p11.2),-15,add(19)(q13.3),-21,+2mar[5]/45,XY,der(1)t(1;?21)(p13;q11.2),-5,-7,+8,-10,add(12)(p11.2),-15,add(19)(q13.3),-21,+3mar[5] | Not done                    |
| 130208               | AML, M1   | 21               | Male   | 46,XY[20]                                                                                                                                                                                           | NPM1+, FLT3-ITD+, FLT3-TKD- |
| 130237               | AML       | 66               | Male   | 46,XY,inv(3)(q21q26.2)[3]/45,idem,-7[8]                                                                                                                                                             | Not done                    |

Table S1: AML patient demographics

**Table S2: Kinase inhibitor vs. Ethacridine Screen - Synergistic Hits in OCI-AML2 cells**

| Drug ID | Drug Name                                                         | EOBA Score (Positive Average) |
|---------|-------------------------------------------------------------------|-------------------------------|
| 51      | GW583340 dihydrochloride                                          | 30.77184297                   |
| 41      | Erlotinib HCl                                                     | 30.43758104                   |
| 222     | WHI-P 154                                                         | 20.13326048                   |
| 298     | MP-470                                                            | 20.27292262                   |
| 49      | GW2974                                                            | 22.10812172                   |
| 94      | NU7026                                                            | 17.83329294                   |
| 205     | ABT 702 dihydrochloride                                           | 18.19870623                   |
| 290     | CP-724714                                                         | 17.66650374                   |
| 24      | Gefitinib                                                         | 17.72786918                   |
| 294     | GSK690693                                                         | 15.75558624                   |
| 454     | PF 3644022. PF-3644022                                            | 15.58273618                   |
| 391     | WYE-354                                                           | 15.45253236                   |
| 416     | KRN 633. KRN-633                                                  | 15.16336556                   |
| 225     | ZM 306416 hydrochloride                                           | 15.04140718                   |
| 95      | PD 153035                                                         | 14.47866056                   |
| 409     | PCI-32765                                                         | 14.2904798                    |
| 439     | NVP-BSK805                                                        | 13.89232596                   |
| 315     | YM201636                                                          | 13.87142115                   |
| 462     | RET Inhibitor Example 8 (Free base)                               | 14.47015136                   |
| 25      | Lapatinib ditosylate                                              | 14.36911604                   |
| 465     | GDC-0941                                                          | 12.7873387                    |
| 147     | L 779450                                                          | 13.86809741                   |
| 264     | MK-2206                                                           | 12.72352988                   |
| 273     | AG13958                                                           | 12.75445564                   |
| 401     | MK2 inhibitor. compound 35                                        | 12.2438692                    |
| 224     | Ki 8751                                                           | 12.94986915                   |
| 139     | API-2                                                             | 11.83008156                   |
| 383     | R406. R-406. NSC-742317                                           | 12.20655202                   |
| 352     | WZ4002. WZ-4002                                                   | 11.07254921                   |
| 35      | LY-294.002                                                        | 14.05935484                   |
| 375     | BMS 794833. BMS-794833                                            | 10.22023736                   |
| 73      | PI-828                                                            | 11.62187294                   |
| 65      | Compound 52                                                       | 10.1381685                    |
| 379     | Merck-22-6                                                        | 11.51830288                   |
| 284     | Bisindoylmaleimide X. HCl salt                                    | 9.690687924                   |
| 64      | Chk2 Inhibitor II                                                 | 10.84130228                   |
| 400     | R788. R-788. Fostamatinib disodium. R935788. R-935788. NSC-745942 | 9.355367882                   |
| 448     | GSK PERK Inhibitor                                                | 9.498289982                   |
| 353     | Pp242                                                             | 9.241955778                   |
| 7       | GDC-0941 bismesylate                                              | 9.203203604                   |
| 366     | XL-184. XL184. BMS-907351. Cabozantinib malate                    | 8.82795209                    |
| 433     | Indirubin. NSC-105327. Courouputine B. Indigo red. Indigopurpurin | 8.75581972                    |
| 358     | MK-8033                                                           | 8.539584258                   |
| 188     | PHA 665752                                                        | 8.395860869                   |
| 471     | BIX-RSK2 Inhibitor                                                | 8.219877221                   |
| 325     | Cyclapolin 9                                                      | 8.21426945                    |
| 411     | LDN193189. LDN-193189. DM-3189                                    | 8.016117669                   |
| 27      | Rapamycin                                                         | 7.922971889                   |
| 309     | SB590885                                                          | 9.538849155                   |
| 157     | Tyrphostin AG 1478                                                | 10.12531485                   |
| 459     | PTK6 CompoundA                                                    | 9.027401292                   |
| 301     | PD04217903. PF-04217903                                           | 10.73269676                   |
| 292     | CYT11387. CYT387                                                  | 8.081232215                   |
| 240     | Src I1                                                            | 7.820374967                   |
| 21      | NH125                                                             | 8.60234648                    |
| 449     | NQDI-1                                                            | 7.675429947                   |
| 262     | Janex-1. WHI-P131                                                 | 7.027091012                   |
| 52      | GW8510                                                            | 8.146822984                   |
| 434     | AT7867. AT-7867                                                   | 6.944426332                   |

|     |                                                      |             |
|-----|------------------------------------------------------|-------------|
| 470 | VE-821                                               | 7.256648708 |
| 440 | JNJ-38158471                                         | 6.801443449 |
| 269 | JNJ-38877605                                         | 7.113783437 |
| 250 | PF-04217903                                          | 6.762794894 |
| 18  | AG 1296                                              | 7.795786354 |
| 103 | Dasatanib                                            | 8.066966968 |
| 29  | Vandetanib                                           | 7.538005179 |
| 275 | Akt-I-1                                              | 6.953939472 |
| 126 | PF 573228                                            | 8.080302587 |
| 365 | KU-60019                                             | 6.712694389 |
| 443 | GSK-2118436B. GSK2118436B. Dabrafenib mesylate       | 6.486627247 |
| 453 | NVP-BHG712                                           | 6.586036872 |
| 438 | S6K-18                                               | 6.225017741 |
| 343 | PKC theta inhibitor                                  | 6.213352089 |
| 444 | CH5424802                                            | 7.480572003 |
| 98  | Rho Kinase Inhibitor V                               | 6.10119816  |
| 415 | WZ3146. WZ-3146                                      | 6.051706206 |
| 13  | PD 169316                                            | 5.989328573 |
| 331 | NIK Kinase Inhibitor                                 | 5.913207188 |
| 154 | Bisindolylmaleimide I hydrochloride                  | 7.481438097 |
| 247 | Pazopanib hydrochloride. GW-786034. Armala. Votrient | 5.873965511 |
| 289 | CC-401                                               | 6.39416757  |
| 267 | LY 333531 mesylate. Ruboxistaurin                    | 6.304517045 |
| 468 | A 1070722                                            | 6.054740785 |
| 280 | AV951. KRN951. Tivozanib                             | 6.789841872 |
| 437 | BMS-582664. Brivanib alaninate                       | 5.794426662 |
| 398 | Rigel JAK Compound II. Prodrug of VI-53              | 5.78774017  |
| 397 | JAK compound I (VI-53)                               | 6.448658092 |
| 57  | SD 208                                               | 10.59753778 |
| 344 | ILK inhibitor                                        | 4.825455917 |
| 374 | AZ 3146. AZ-3146                                     | 4.815679292 |
| 472 | BYL-719. NVP-BYL-719                                 | 5.74016716  |
| 248 | Cediranib. AZD-2171. Recentin                        | 4.784588135 |
| 238 | SU 16f                                               | 5.025008661 |
| 302 | PF562271                                             | 6.571839905 |
| 432 | XL765. XL-765. SAR245409                             | 4.955863952 |
| 67  | BIBU 1361 dihydrochloride                            | 6.350164418 |
| 43  | Wortmannin                                           | 4.214136168 |
| 257 | BIBF-1120. Intedanib. Vargatef                       | 5.116660471 |
| 442 | SCH900776                                            | 4.416218019 |
| 189 | Diocanoylglycol                                      | 3.554355878 |
| 478 | Apatinib mesylate. YN-968D1                          | 3.055592939 |
| 407 | Y-39983. RKI-983. SNJ-1656                           | 3.307495861 |
| 476 | Crenolanib. ARO-002. CP-868596                       | 3.32747737  |
| 127 | TPCA-1                                               | 4.036430171 |
| 422 | CCT129202. CCT-129202                                | 3.978110298 |
| 340 | BKM120. BKM-120. NVP-BKM-120                         | 4.859079621 |
| 37  | PD 98059                                             | 3.512848859 |
| 229 | IKK 16                                               | 5.430334251 |
| 146 | Sorafenib                                            | 7.860780447 |
| 460 | PTK6 Inhibitor CompoundB                             | 4.155434757 |
| 69  | BIBX 1382 dihydrochloride                            | 6.23424859  |
| 260 | PD-0332991. PD-332991                                | 2.612012821 |
| 341 | AB12134C3. PNK inhibitor                             | 3.631570758 |
| 47  | BMS-345541                                           | 2.667739671 |
| 184 | Imidolo-oxindole PKR inhibitor C16                   | 2.978080709 |
| 219 | IPA 3                                                | 2.912752664 |
| 350 | ASC-086. APY 86                                      | 3.047140325 |
| 142 | CGP 57380                                            | 2.951648241 |
| 61  | SU 6656                                              | 2.717072861 |
| 179 | TX-1918                                              | 2.807794864 |

|    |                                                                              |             |
|----|------------------------------------------------------------------------------|-------------|
| 1  | 2-Thio(3-iodobenzyl)-5-(1-pyridyl)-[1.3.4]-oxadiazole                        | 1.722399439 |
| 2  | AS 601245                                                                    | 0.905536923 |
| 3  | NU6102                                                                       | 1.744521196 |
| 4  | BX 795                                                                       | 1.775301853 |
| 5  | CHIR 98014 isomer                                                            | 0.94992022  |
| 6  | CT 99021                                                                     | 1.482171052 |
| 8  | GSK269962A                                                                   | 0           |
| 9  | GW 843682X                                                                   | 0.860294855 |
| 10 | MLN-518                                                                      | 5.45905422  |
| 11 | NSC 625987                                                                   | 2.355724255 |
| 12 | NVP-BEZ235                                                                   | 0           |
| 14 | PD 180970                                                                    | 2.118637742 |
| 15 | PD 184352                                                                    | 1.605931205 |
| 16 | PIK 90                                                                       | 0.948176218 |
| 17 | PIK-75                                                                       | 0           |
| 19 | AS604850                                                                     | 0           |
| 20 | JNJ-10198409                                                                 | 0           |
| 22 | PI-103                                                                       | 1.783267517 |
| 23 | Axitinib                                                                     | 2.55763063  |
| 26 | Vatalanib dihydrochloride                                                    | 3.04679299  |
| 28 | VX-680                                                                       | 4.436335576 |
| 30 | Everolimus                                                                   | 0.785996348 |
| 31 | Fasudil HCl                                                                  | 0.669249607 |
| 32 | Imatinib Mesylate                                                            | 0           |
| 33 | K-252a                                                                       | 0.800017942 |
| 34 | Lestaurtinib                                                                 | 0.239081479 |
| 36 | Go 6976                                                                      | 0.415888134 |
| 38 | PKC-412                                                                      | 1.195645905 |
| 39 | Roscovitine                                                                  | 0           |
| 40 | FK-506                                                                       | 0           |
| 42 | Staurosporine                                                                | 0.523478072 |
| 44 | 6-bromoindirubin-3'-oxime                                                    | 1.451737579 |
| 45 | AR-A014418                                                                   | 1.16245173  |
| 46 | BAY 61-3606 hydrochloride                                                    | 2.71136163  |
| 48 | CGP-74514A hydrochloride                                                     | 2.965604836 |
| 50 | GW441756 hydrochloride                                                       | 4.914997597 |
| 53 | IRAK-1/4 Inhibitor I                                                         | 2.473118766 |
| 54 | PD173074                                                                     | 2.936544399 |
| 55 | PS1145 dihydrochloride                                                       | 2.416413329 |
| 56 | SB-505124 hydrochloride hydrate                                              | 0           |
| 58 | SIS3                                                                         | 0.031145864 |
| 59 | SKF-86002                                                                    | 0.173011536 |
| 60 | STO-609 acetic acid                                                          | 4.490469082 |
| 62 | ZM 39923 hydrochloride                                                       | 1.58924005  |
| 63 | 6-[4-(2-Piperidin-1-ylethoxy)phenyl]-3-pyridin-4-ylpyrazolo[1.5-a]pyrimidine | 4.704447485 |
| 66 | AEG 3482                                                                     | 1.328735376 |
| 68 | CGP 57380                                                                    | 0           |
| 70 | GTP 14564                                                                    | 0.428690441 |
| 71 | GW-5074                                                                      | 0           |
| 72 | LY-364947                                                                    | 0.008583469 |
| 74 | PQ401                                                                        | 0           |
| 75 | SB 203580                                                                    | 2.290578304 |
| 76 | SB 216763                                                                    | 0           |
| 77 | SB 239063                                                                    | 0.445056063 |
| 78 | SB 415286                                                                    | 3.376180683 |
| 79 | SB 431542                                                                    | 0           |
| 80 | SD 169                                                                       | 0           |
| 81 | N-(4-Pyridyl)-N'-(2.4.6-trichlorophenyl)urea                                 | 0           |
| 82 | 2-(p-Hydroxyanilino)-4-(p-chlorophenyl) thiazole. HCl                        | 1.219897426 |
| 83 | 2-Dimethylamino-4.5.6.7-tetrabromo-1H-benzimidazole                          | 0.855576232 |
| 84 | 5-(3-Methoxy-4-((4-methoxybenzyl)oxy)benzyl)-pyrimidine-2.4-diamine          | 0           |
| 85 | PP2                                                                          | 0           |
| 86 | TPL2                                                                         | 1.120116997 |
| 87 | TWS119                                                                       | 1.365881873 |
| 88 | Sorafenib.p-Toluenesulfonate Salt                                            | 0           |
| 89 | IC261                                                                        | 0.708974961 |

|     |                                                                        |             |
|-----|------------------------------------------------------------------------|-------------|
| 90  | JNJ-7706621                                                            | 0.08172212  |
| 91  | KN-62                                                                  | 1.852070146 |
| 92  | KU-55933                                                               | 0.629082346 |
| 93  | Kenpaullone                                                            | 0           |
| 96  | PIM1/2 Kinase Inhibitor VI                                             | 1.507459992 |
| 97  | eIF-2a Inhibitor II. Sal003                                            | 0           |
| 99  | Nilotinib                                                              | 0.316472945 |
| 100 | AZD6244                                                                | 2.336846739 |
| 101 | BIBW-2992                                                              | 2.970809302 |
| 102 | Purvalanol A                                                           | 3.929006761 |
| 104 | CI-1033                                                                | 2.035231891 |
| 105 | SC 514                                                                 | 0.774268408 |
| 106 | CP-690550                                                              | 3.2842066   |
| 107 | Bosutinib                                                              | 1.77365935  |
| 108 | Pimecrolimus                                                           | 1.013650091 |
| 109 | Rottlerin                                                              | 3.345340889 |
| 110 | Temsirolimus                                                           | 3.991250726 |
| 111 | Ro 31-8220 mesylate                                                    | 0.604624103 |
| 112 | 7-Cyclopentyl-5-(4-phenoxyphenyl)-7H-pyrrolo[2.3-d]pyrimidin-4-ylamine | 0.523105694 |
| 113 | D4476                                                                  | 0           |
| 114 | SU-11274                                                               | 3.47222843  |
| 115 | Masitinib mesylate                                                     | 0           |
| 116 | H 89 dihydrochloride                                                   | 2.228902611 |
| 117 | ER 27319 maleate                                                       | 0           |
| 118 | CID 755673                                                             | 0.859264043 |
| 119 | PF 670462                                                              | 0.180086325 |
| 120 | SKF 86002 dihydrochloride                                              | 0           |
| 121 | SL327                                                                  | 3.11161339  |
| 122 | SP-600125                                                              | 2.878769966 |
| 123 | Sphingosine                                                            | 0           |
| 124 | SU 4312                                                                | 0.700566761 |
| 125 | SU 5416                                                                | 0.597915191 |
| 128 | Quercetin                                                              | 1.129907935 |
| 129 | FAK Inhibitor 14                                                       | 0           |
| 130 | ZM 336372                                                              | 2.532655937 |
| 131 | XRP44X                                                                 | 0           |
| 132 | Necrostatin-1                                                          | 0           |
| 133 | PD 407824                                                              | 0.023115526 |
| 134 | PHA 767491 hydrochloride                                               | 0           |
| 135 | TCS PIM-1 1                                                            | 0           |
| 136 | SKI II                                                                 | 0.908244408 |
| 137 | 10-DEBC hydrochloride                                                  | 0.073375593 |
| 138 | FPA 124                                                                | 0           |
| 140 | SGI-1776                                                               | 4.350720614 |
| 141 | A-443654                                                               | 0           |
| 143 | SU 6668                                                                | 0           |
| 144 | TAE-684                                                                | 1.962381665 |
| 145 | AZD0530                                                                | 3.188537828 |
| 148 | PLX4720                                                                | 0.901829273 |
| 149 | BI 2536                                                                | 0           |
| 150 | Mubritinib                                                             | 1.718454692 |
| 151 | BMS-599626                                                             | 1.378808373 |
| 152 | Motesanib diphosphate salt                                             | 0           |
| 153 | ZSTK474                                                                | 1.176442571 |
| 155 | VX-702                                                                 | 0           |
| 156 | ZM447439                                                               | 0.930634883 |
| 158 | Tyrphostin SU 1498                                                     | 0           |
| 159 | U0126                                                                  | 0           |
| 160 | Chelerythrine chloride                                                 | 0.345964988 |
| 161 | Imatinib (free base). Gleevec. Glivec. CGP-57148B. STI-571             | 0.369558101 |
| 162 | RDEA-119. AR-119                                                       | 4.014422065 |
| 163 | SB 202190. FHPI                                                        | 3.46461885  |
| 164 | Alsterpaullone                                                         | 1.490230977 |
| 165 | NSC 663284                                                             | 1.079882394 |
| 166 | NU 2058                                                                | 0.949374107 |
| 167 | PD0325901                                                              | 0           |

|     |                                                  |             |
|-----|--------------------------------------------------|-------------|
| 168 | PD 184161                                        | 1.386931608 |
| 169 | EKI-785. CL-387.785                              | 2.325654139 |
| 170 | Olomoucine                                       | 1.036279525 |
| 171 | BMS-536924                                       | 2.920304613 |
| 172 | NVP-AEW541. AEW541                               | 1.013650091 |
| 173 | Sunitinib Malate. Sutent. SU-11248. PHA-290940AD | 0.257579952 |
| 174 | Y-27632                                          | 3.271691381 |
| 175 | AS 252424                                        | 1.736310034 |
| 176 | Ryuvidine                                        | 0.425326206 |
| 177 | TGX 221                                          | 1.231557415 |
| 178 | Dovitinib. CHIR-258. TKI-258. GFKI-258           | 1.623174956 |
| 180 | OSU-03012 hydrochloride                          | 2.332792472 |
| 181 | K-252c. Staurosporine Aglycone                   | 2.616812056 |
| 182 | IC87114. PIK-39. PIK-23                          | 1.880988049 |
| 183 | Akt 1/2 Kinase inhibitor                         | 3.446745276 |
| 185 | SU 9516                                          | 1.820491435 |
| 186 | Compound 401                                     | 4.390090049 |
| 187 | NSC 109555 ditosylate. DDUG                      | 4.416662383 |
| 190 | R 59-022                                         | 4.631298509 |
| 191 | AG 490. TyrphostinAG 490                         | 4.381504199 |
| 192 | PD 158780                                        | 3.434840869 |
| 193 | AG 18. RG-50810. TyrphostinA23                   | 1.107630872 |
| 194 | AG 213. Tyrphostin AG 213                        | 3.004793854 |
| 195 | AG 494                                           | 4.408086724 |
| 196 | AG 825. Tyrphostin AG 825                        | 2.46788344  |
| 197 | Genistein                                        | 4.362671699 |
| 198 | HDS 029                                          | 0.435565278 |
| 199 | JNJ 28871063 hydrochloride                       | 3.769678215 |
| 200 | Lavendustin A. RG 14355                          | 0.03560686  |
| 201 | PP3                                              | 5.987326375 |
| 202 | Tyrphostin B44. (-) enantiomer                   | 2.631819645 |
| 203 | SB 218078                                        | 0.922302247 |
| 204 | 1-Naphthyl PP1. 1-NA-PP 1                        | 0.203925048 |
| 206 | 5-Iodotubercidin                                 | 0.477800089 |
| 207 | A 83-01                                          | 0           |
| 208 | Dorsomorphin dihydrochloride. BML-275            | 4.428431031 |
| 209 | CGK 733                                          | 1.9610438   |
| 210 | LFM-A13                                          | 3.118215029 |
| 211 | TCS JNK 5a                                       | 0.742814866 |
| 212 | BI 78D3                                          | 0.27454247  |
| 213 | Arcyriaflavin A                                  | 2.411078819 |
| 214 | ML 9 hydrochloride                               | 4.126692412 |
| 215 | Ellagic acid                                     | 0.697110981 |
| 216 | TBB. NSC 231634                                  | 0           |
| 217 | GSK 650394                                       | 1.027780081 |
| 218 | DCA. Dichloroacetate                             | 0           |
| 220 | (5Z)-7-Oxozeaenol                                | 1.547321274 |
| 221 | Purvalanol B. NG 95                              | 0.058290563 |
| 223 | SU 5402                                          | 3.327018334 |
| 226 | ZM 323881 hydrochloride                          | 3.67217498  |
| 227 | NSC 693868                                       | 0           |
| 228 | Arctigenin. (-)-Arctigenin                       | 2.013078521 |
| 230 | IMD 0354                                         | 0.018118992 |
| 231 | JX 401                                           | 1.326541135 |
| 232 | EO 1428                                          | 1.547800244 |
| 233 | RWJ 67657                                        | 1.182607875 |
| 234 | PD 198306                                        | 3.977251959 |
| 235 | TCS 359                                          | 0.770663968 |
| 236 | TCS 2312 dihydrochloride                         | 0           |
| 237 | H 1152. Glycyl dihydrochloride                   | 1.349046038 |
| 239 | PIM 1 Inhibitor 2                                | 0.754125846 |
| 241 | PP-1. PP1. AGL-1872. Tyrphostin-PP1              | 1.436435369 |
| 242 | HA 1100 hydrochloride. Hydroxyfasudil            | 0           |
| 243 | Cyclopolin9                                      | 1.77943098  |
| 244 | C-1                                              | 0.528788738 |
| 245 | DMPQ dihydrochloride                             | 0.817225517 |

|     |                                                                                |             |
|-----|--------------------------------------------------------------------------------|-------------|
| 246 | PF-02341066. PF-2341066                                                        | 4.517503672 |
| 249 | XL-880. GSK-1363089. EXEL-2880. GSK-089. foretinib                             | 4.875536641 |
| 251 | GDC-0879. AR-00341677                                                          | 3.095807926 |
| 252 | ABT-869. Linifanib. AL-39324. RG-3635                                          | 6.838466573 |
| 253 | AZD-1152. Barasertib                                                           | 0.667819826 |
| 254 | Enzastaurin. LY-317615                                                         | 2.05709975  |
| 255 | AP-24534                                                                       | 2.346660985 |
| 256 | MLN-8237                                                                       | 0.436876408 |
| 258 | PHA-739358. Danusertib                                                         | 1.073237806 |
| 259 | AZD-7762 hydrochloride                                                         | 0.456836473 |
| 261 | Brivanib. BMS-540215                                                           | 0.03560686  |
| 263 | GSK-1904529A. GSK1904529A                                                      | 2.488991    |
| 265 | SGX-523                                                                        | 5.593120706 |
| 266 | XL-147. XL147. SAR-245408                                                      | 3.776356661 |
| 268 | Alvocidib. HMR-1275. L-868275. MDL-107826A. NSC-649890. L-868276. Flavopiridol | 1.151724582 |
| 270 | GSK-461364. GSK461364                                                          | 0.03055973  |
| 271 | BI-6727. volasertib                                                            | 0           |
| 272 | AC220                                                                          | 1.679649096 |
| 274 | Akt-I-1.2                                                                      | 2.715645309 |
| 276 | AMG-47a                                                                        | 0           |
| 277 | AMG-Tie2-1                                                                     | 0.37881874  |
| 278 | AT9283                                                                         | 0.517835253 |
| 279 | AT-7519                                                                        | 2.763297257 |
| 281 | AV-412. MP-412                                                                 | 1.259583711 |
| 282 | AZ-960                                                                         | 1.474724899 |
| 283 | BI-D1870                                                                       | 2.409734806 |
| 285 | BMS-2                                                                          | 1.988540986 |
| 286 | BMS-3                                                                          | 1.518827347 |
| 287 | BMS-5                                                                          | 0           |
| 288 | BX912                                                                          | 3.6192866   |
| 291 | CYC-116                                                                        | 0.56482741  |
| 293 | E7080                                                                          | 1.17085105  |
| 295 | Ki20227 (+/-)                                                                  | 0           |
| 296 | KU0063794                                                                      | 0           |
| 297 | Merck-5. Mk-5                                                                  | 1.222415627 |
| 299 | PD173955                                                                       | 2.28886885  |
| 300 | PD173955-Analogue 1                                                            | 3.4132416   |
| 303 | PHA690509                                                                      | 0           |
| 304 | PI-93                                                                          | 2.51972087  |
| 305 | PIK-294                                                                        | 4.203363213 |
| 306 | R1487                                                                          | 0.277987268 |
| 307 | RHO-15                                                                         | 0           |
| 308 | SB242235                                                                       | 0.627696098 |
| 310 | SD-06                                                                          | 0           |
| 311 | SNS-032. BMS387032                                                             | 0           |
| 312 | SNS-314                                                                        | 1.374540954 |
| 313 | SR3677                                                                         | 1.774412841 |
| 314 | TAK-715                                                                        | 0.290430077 |
| 316 | MK-1775. MK1775                                                                | 0.927730103 |
| 317 | Lim2 Kinase Inhibitor                                                          | 2.050995128 |
| 318 | AZD-1152-HQPA. Barasertib                                                      | 0           |
| 319 | ERK2 inhibitor                                                                 | 0.72564669  |
| 320 | PV-1019. NSC-744039                                                            | 0           |
| 321 | MAZ51. MAZ-51                                                                  | 2.252187929 |
| 322 | IC86621. IC-86621                                                              | 4.573404506 |
| 323 | ST638. ST-638                                                                  | 4.799359981 |
| 324 | TG003. TG-003                                                                  | 3.027454146 |
| 326 | PF431396. PF-431396                                                            | 2.957009057 |
| 327 | (+)-P276. P276-00                                                              | 2.902379472 |
| 328 | CX-4945                                                                        | 3.862310507 |
| 329 | Dianilinopyrimidine_01                                                         | 1.992405772 |
| 330 | BIRB 796. Doramapimod                                                          | 0.72535681  |
| 332 | Neratinib. HKI-272. CPD-820                                                    | 2.159094672 |
| 333 | EMD-1214063                                                                    | 1.474603354 |
| 334 | SMG-1 Compound 467                                                             | 1.347675983 |
| 335 | ENMD-2076. ENMD-981693                                                         | 1.582161035 |



|     |                                                        |             |
|-----|--------------------------------------------------------|-------------|
| 336 | AS-703026. MSC1936369B                                 | 0.145750953 |
| 337 | AZD-8055. AZD 8055. AZD8055                            | 1.567173469 |
| 338 | OSI-027 hydrochloride                                  | 2.662123008 |
| 339 | AMG-900                                                | 0.202359729 |
| 342 | PERK inhibitor                                         | 2.981688335 |
| 345 | PF-04691502. PF4691502. PF-502                         | 3.712879986 |
| 346 | ASC-033. APY 33                                        | 5.41561985  |
| 347 | ASC-069. APY 69                                        | 0.126776457 |
| 348 | ASC-081. APY 81                                        | 6.818668539 |
| 349 | ASC-082. APY 82                                        | 0.903548656 |
| 351 | Quinalizarin                                           | 2.244000449 |
| 354 | OSI-906. Linsitinib                                    | 0.390725937 |
| 355 | INCB018424. Ruxolitinib                                | 4.476957715 |
| 356 | PLX-4032. Vemurafenib. Zelboraf                        | 3.36671892  |
| 357 | BMS-754807                                             | 4.823509223 |
| 359 | GSK-1120212                                            | 0           |
| 360 | BGT-226. NVP-BGT-226. NVP-BGT226                       | 0.183436803 |
| 361 | TG-101348                                              | 0           |
| 362 | Cdk1/2 Inhibitor III                                   | 0.585423524 |
| 363 | RO-5126766                                             | 0           |
| 364 | BS-181 hydrochloride                                   | 5.479560293 |
| 367 | CP466722. CP-466722                                    | 1.638802742 |
| 368 | XMD8-92. XMD-8-92                                      | 2.469645588 |
| 369 | AZ628. AZ-628                                          | 2.456269111 |
| 370 | S-99                                                   | 3.097172149 |
| 371 | CHIR-124                                               | 0.376294577 |
| 372 | AZD-7762. AZD 7762                                     | 0           |
| 373 | LY2784544. LY-2784544                                  | 2.162175252 |
| 376 | PI3-Kinase a Inhibitor 2                               | 2.08864383  |
| 377 | BIX 02189. BIX-02189                                   | 5.483215553 |
| 378 | IRAK4 Inhibitor                                        | 0.185350462 |
| 380 | PF 4708671. PF-4708671                                 | 2.632182516 |
| 381 | PHA-793887                                             | 0.191784579 |
| 382 | AZD5438. AZD-5438                                      | 0.759631589 |
| 384 | HMN-214. IVX-214                                       | 3.279145496 |
| 385 | ON-01910. Estybon                                      | 2.998965619 |
| 386 | AZD8330. AZD-8330. ARRY-424704. ARRY-704               | 0.021372867 |
| 387 | RAF265. RAF-265. CHIR-265                              | 2.359076945 |
| 388 | Tipifarnib. NSC-702818. R-115777. Zarnestra. IND 58359 | 1.065311567 |
| 389 | CAL-101. GS-1101                                       | 3.754246458 |
| 390 | PIK-294                                                | 4.834017635 |
| 392 | TC-A 2317 hydrochloride                                | 0.310897052 |
| 393 | ARQ-197. Tivantinib                                    | 1.673901832 |
| 394 | AZD-4547                                               | 3.945084399 |
| 395 | AZD-1480. AZD1480                                      | 4.368620051 |
| 396 | BAY 73-4506. Regorafenib                               | 0.680794971 |
| 399 | TBK1 Inhibitor                                         | 2.827820594 |
| 402 | GLPG-0259. Compound A                                  | 1.764909572 |
| 403 | ASP-3026                                               | 4.490049925 |
| 404 | SJN 2511                                               | 0.2561214   |
| 405 | BGJ-398. NVP-BGJ-398. NVP-BGJ398                       | 3.255158099 |
| 406 | BMS 777607. BMS-777607                                 | 2.02093259  |
| 408 | GSK-1059615. GSK-615                                   | 2.342556014 |
| 410 | Y-27632                                                | 0           |
| 412 | A 769662. A-769662                                     | 3.637227831 |
| 413 | WZ8040. WZ-8040                                        | 3.254761385 |
| 414 | Pelitinib. EKB-569. WAY-EKB-569                        | 4.051705026 |
| 417 | MGCD-265                                               | 2.995511343 |
| 418 | OSI-930                                                | 3.055792586 |
| 419 | NVP-ADW742. ADW-742. ADW. GSK-552602-A. NVP-ADW-742    | 4.412517534 |
| 420 | KW 2449. KW-2449                                       | 1.968614327 |
| 421 | SB-525334                                              | 1.466576995 |
| 423 | Aurora A Inhibitor I                                   | 4.935585875 |
| 424 | Hesperadin                                             | 2.56461991  |
| 425 | PHA-680632                                             | 3.838696088 |
| 426 | PD318088                                               | 2.927543736 |

|     |                                             |             |
|-----|---------------------------------------------|-------------|
| 427 | LY2228820. LY-2228820                       | 2.380379199 |
| 428 | AS605240. AS-605240                         | 3.446794976 |
| 429 | VX-745                                      | 2.885088482 |
| 430 | AZD6482                                     | 1.928972704 |
| 431 | TG100-115. TG-100-115. TG-100115            | 5.898152092 |
| 435 | AEE 788. AEE-788. NVP-AEE-788               | 4.06004754  |
| 436 | AZD-5363. AZD5363                           | 6.310115627 |
| 441 | OSI-TAK1 inhibitor                          | 2.452566166 |
| 445 | AT-7519 hydrochloride. AT7519 hydrochloride | 1.838197114 |
| 446 | LY2835219. LY-2835219                       | 5.838433354 |
| 447 | AZ TAK1 Inhibitor                           | 1.846887949 |
| 450 | PX-866. DJM-166. DJM-2-166                  | 4.389135938 |
| 451 | TCS 2312                                    | 0.49656892  |
| 452 | OICR0000857A                                | 2.908897155 |
| 455 | GSK 2334470. GSK-2334470                    | 4.167293714 |
| 456 | TTP 22                                      | 3.541177564 |
| 457 | GW 788388. GW-788388                        | 2.77599844  |
| 458 | TC-DAPK 6                                   | 2.493616281 |
| 461 | OICR0000666A01                              | 2.44385345  |
| 463 | CCT137690                                   | 0.678844499 |
| 464 | AMG458                                      | 1.588283994 |
| 466 | MK-5108. VX-689                             | 4.613947091 |
| 467 | BAY 57-9352. Telatinib                      | 0.948409116 |
| 469 | Dacomitinib hydrate                         | 0.636678924 |
| 473 | PHA-848125. PHA-848125AC                    | 0.881398253 |
| 474 | LY-2157299                                  | 0.41695833  |
| 475 | WAY-600                                     | 6.27797149  |
| 477 | WYE-125132. WYE-132                         | 1.617313899 |
| 479 | MLN8054. MLN-8054                           | 0.519681572 |
| 480 | Dinaciclib. MK-7965. NSC-727135. SCH-727965 | 0.161138734 |

# Figure S1

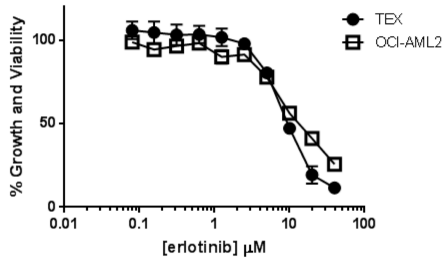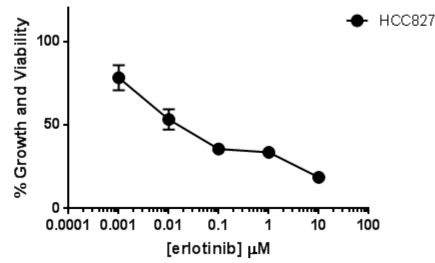

| Cell Line | Avg IC50 (μM) (n=3) |
|-----------|---------------------|
| TEX       | 8.99                |
| OCI-AML2  | 15.61               |

| Cell Line | Avg IC50 (μM) (n=3) |
|-----------|---------------------|
| HCC827    | 0.09                |

**Figure S1: Erlotinib sensitivity in TEX and OCI-AML2 cells**

TEX, OCI-AML2, and HCC827 cells were treated with increasing concentrations of erlotinib for 72h. Growth and viability was measured using the SRB assay (TEX, OCI-AML2) or Cell Titer Fluor (HCC827) and calculated relative to vehicle-treated cells. Results depict average percent growth and viability  $\pm$  SD from a representative experiment performed in triplicate. Data are representative of three independent experiments.

Figure S2

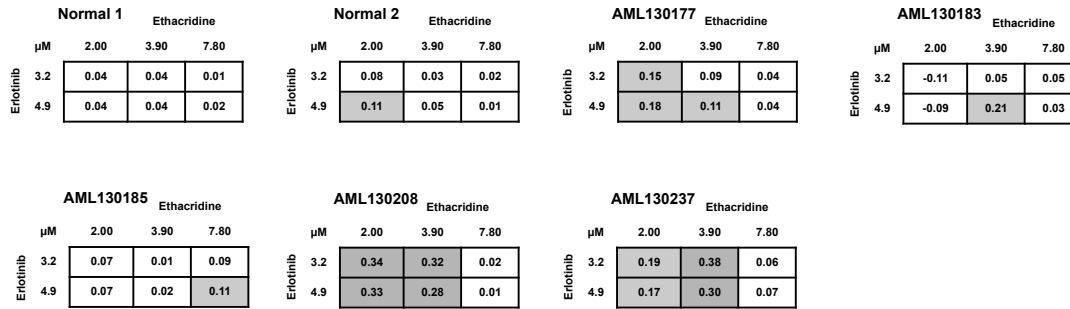

**Figure S2: EOBA synergy tables for combination-treated primary AML samples and PBSCs**

Primary AML blasts (n=5) and PBSCs (n=2) were treated with increasing concentrations of erlotinib, ethacridine, and both drugs in combination for 48h. Viability was determined with Annexin V/PI staining and calculated relative to vehicle-treated controls, and synergy was calculated using the EOBA formula. Data depict average EOBA scores generated from a single experiment performed in triplicate.

Figure S3

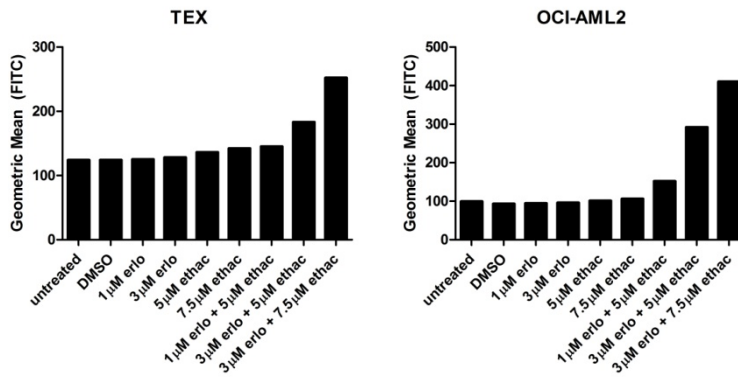

**Figure S3: Autofluorescence evaluation of ethacridine-treated TEX and OCI-AML2 cells**

TEX and OCI-AML2 cells were treated with ethacridine, erlotinib, or both drugs in combination for 24 hours. Autofluorescence of unstained cells in the FITC channel was assessed by flow cytometry.

# Figure S4

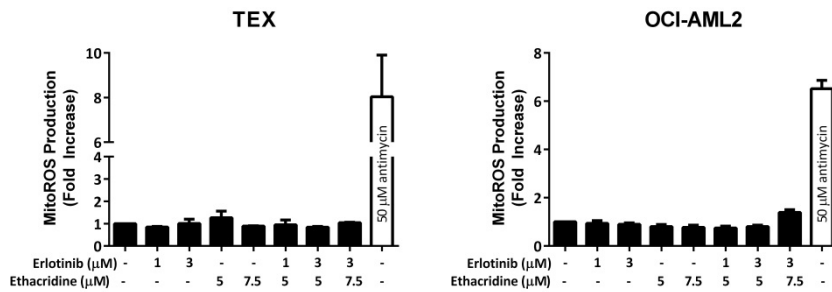

**Figure S4: Mitochondrial ROS production in combination-treated TEX and OCI-AML2 cells**

TEX and OCI-AML2 cells were combination-treated with erlotinib and ethacridine for 24h. Mitochondrial ROS was measured with MitoSOX-PE staining and dead cells were excluded by Annexin V-FITC staining. Fold increase in ROS production was calculated relative to the geometric mean fluorescence intensity of vehicle-treated cells. Antimycin A was included as a positive mitochondrial ROS control. Results depict mean fold increase in GMFI  $\pm$  SD from a representative experiment performed in triplicate. Data are representative of two independent experiments.

Figure S5

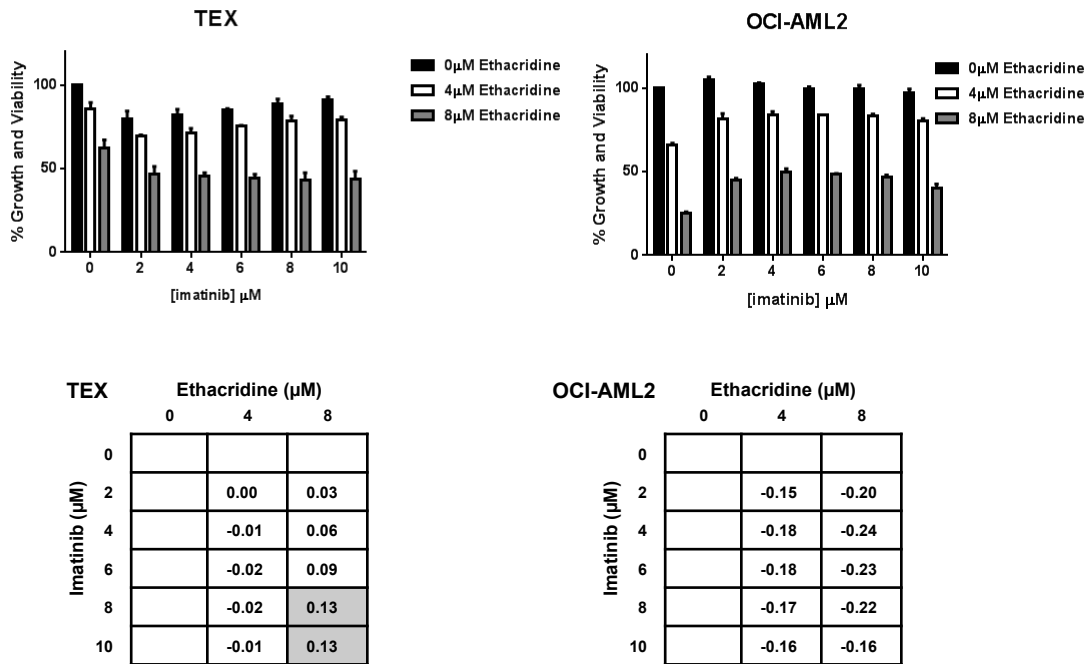

**Figure S5: Imatinib does not synergize with ethacridine in TEX and OCI-AML2 cells**

TEX and OCI-AML2 cells were treated with increasing concentrations of imatinib and ethacridine alone and in combination. Relative growth and viability following a 72h incubation was measured with the Alamar Blue assay. Synergy was calculated with the Eoba formula. Graphs depict mean percent growth and viability  $\pm$  SD from an experiment performed in triplicate. Tables depict mean Eoba scores from the same experiment. Data are representative of three independent experiments.
